# Supplementary material for: Nicotinamide Riboside Augments Human Macrophage Migration via SIRT3-Mediated Prostaglandin E2 Signaling
Source: MDPI journal article supplement (doi:10.3390/cells13050455), 2024-03-05
Supplement: s1 [file s1]

**Supplementary Figures:**

# **Nicotinamide Riboside Augments Human Macrophage Migration via SIRT3-Mediated Prostaglandin E2 Signaling**

**Jing Wu <sup>1</sup>, Maximilian Bley <sup>1</sup>, Russell S. Steans <sup>1</sup>, Allison M. Meadows <sup>1,2</sup>, Rebecca D. Huffstutler <sup>3</sup>, Rong Tian <sup>4</sup>, Julian L. Griffin <sup>2,5</sup> and Michael N. Sack <sup>1,3,\*</sup>**

<sup>1</sup> Laboratory of Mitochondrial Biology and Metabolism, National Heart, Lung, and Blood Institute, National Institutes of Health, Bldg. 10-CRC, Room 5-3342, 10 Center Drive, Bethesda, MD 20892, USA; jing.wu@nih.gov (J.W.); maximilian.bley@med.uni-heidelberg.de (M.B.); russell.steans@nih.gov (R.S.S.); allisonm.meadows@gmail.com (A.M.M.)

<sup>2</sup> Department of Biochemistry, Cambridge University, Cambridge CB2 1QW, UK; jules.griffin@abdn.ac.uk

<sup>3</sup> Cardiovascular Branch, National Heart, Lung, and Blood Institute, National Institutes of Health, Bethesda, MD 20892, USA; rebecca.huffstutler@nih.gov

<sup>4</sup> Mitochondria and Metabolism Center, Department of Anesthesiology and Pain Medicine, University of Washington School of Medicine, Seattle, WA 98195, USA; rongtian@uw.edu

<sup>5</sup> The Rowett Institute, School of Medicine, Medical Sciences and Nutrition, Foresterhill Campus, Aberdeen AB25 2ZD, UK

\* Correspondence: sackm@nih.gov

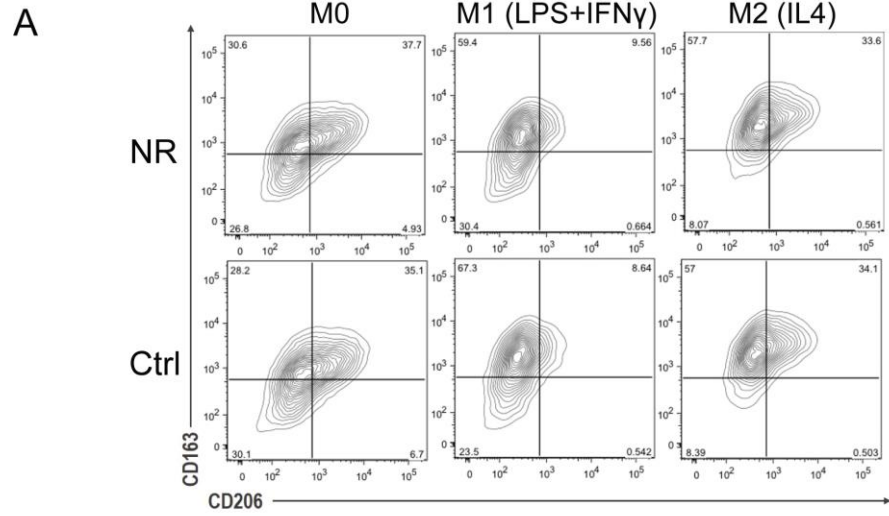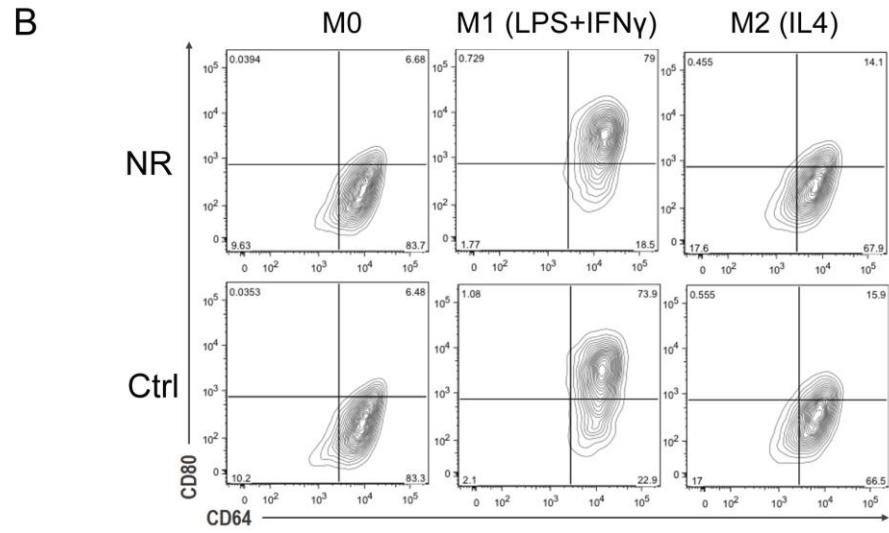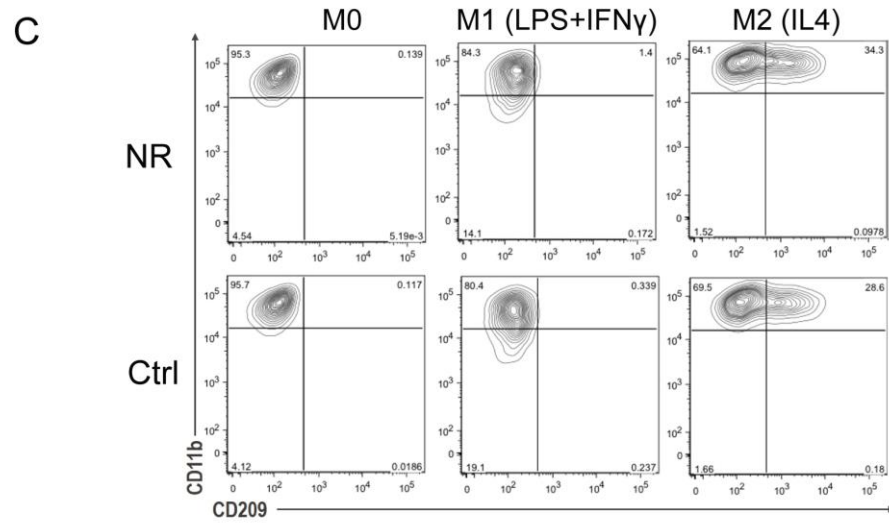

**Figure S1. Flow cytometric analysis of polarization with NR supplementation.**

Representative contour plots showing CD163 and CD206 expression (A), CD64 and CD80 expression (B), CD11b and CD209 expression (C) in 3 different types of human MDMs: M0, M1(LPS+IFN $\gamma$ ), and M2 (IL4) treated with either vehicle (Ctrl, bottom panels) or NR (top panels). The gates represent surface marker expression as a percentage to living cells. These plots confirmed the polarization and there was no visible shift of different populations with or without NR exposure.

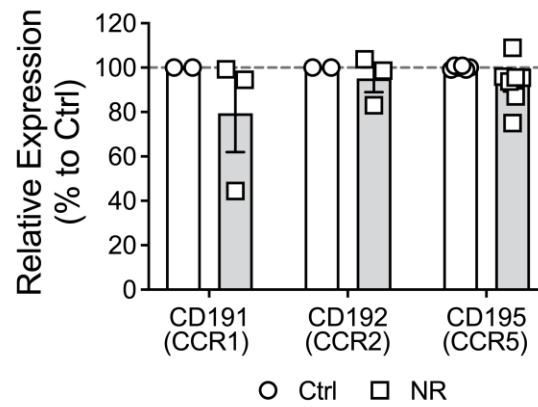

**Figure S2. Flow cytometric analysis of canonical chemokine receptors with NR supplementation.**

Quantification of relative surface expression of CCR1 (CD191), CCR2 (CD192) and CCR5 (CD195) in human M1 MDMs treated with vehicle (Ctrl) or NR for 48hr. Data were analyzed using unpaired two-tailed Student's *t*-test, and represented as mean  $\pm$  SEM.

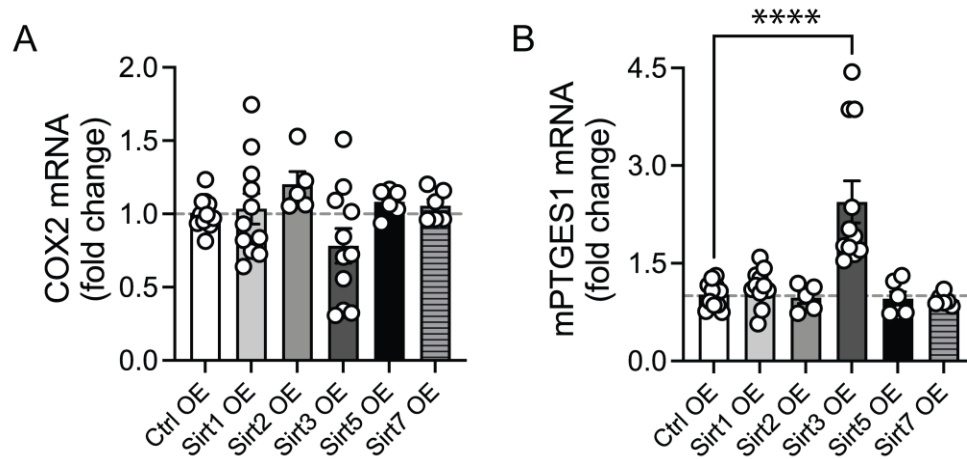

**Figure S3. Overexpression of Sirtuin family members on transcript levels of PGE2 synthesis genes.**

Quantitative RT-PCR analysis of COX-2 (A) and mPTGES-1 (B) transcripts in activated human monocytes (20ng/mL LPS for 8hr) transfected with either empty vector (Ctrl OE) or different Sirtuin-expression plasmids (n=5-11 replicates from 2-4 independent experiments). Data normalized to 18S rRNA and represented as mean  $\pm$  SEM. One-way analysis of variance (ANOVA) with Dunnett's multiple comparisons test. \*\*\*\* $p$ <0.0001.

**Table S1: Human Macrophage Surface Markers and Flow Cytometry Antibodies used in this study.**

| <b>Cluster of Differentiation</b> | <b>Catalog No.</b> | <b>Company</b> | <b>Fluorophore</b> | <b>Clone</b> | <b>Highest Expression in</b> |
|-----------------------------------|--------------------|----------------|--------------------|--------------|------------------------------|
| CD64                              | 555527             | BD Bio         | FITC               | 10.1         | M1                           |
| CD80                              | 561135             | BD Bio         | PECy7              | L307.4       |                              |
| CD197                             | 353204             | Biolegend      | PE                 | G043H7       |                              |
| CD11b                             | 555388             | BD Bio         | PE                 | Mac-1        | M2                           |
| CD209                             | 330108             | BioLegend      | APC                | 9E9AS        |                              |
| CD163                             | 333616             | BioLegend      | BV605              | GH1/61       | M0/M2                        |
| CD206                             | 564062             | BD Bio         | BV421              | 19.2         |                              |
| CD14                              | 561383             | BD Bio         | APC                | M5E2         |                              |
| CD191                             | 362907             | BioLegend      | APC                | 5F10B29      |                              |
| CD192                             | 357208             | BioLegend      | APC                | K036C2       |                              |
| CD192                             | 357213             | BioLegend      | BV605              | K036C2       |                              |
| CD195                             | 565224             | BD Bio         | BUV395             | 2D7/CCR5     |                              |
| Aqua                              | L34966             | Invitrogen     |                    |              |                              |
| DAPI                              | 564907             | BD Bio         |                    |              |                              |
| FcγR                              | 564220             | BD Bio         |                    |              |                              |
